# Supplementary material for: Human Activities Caused Hypoxia Expansion in a Large Eutrophic Estuary: Non-negligible Role of Riverine Suspended Sediments
Source: Copernicus journal article supplement (doi:10.5194/egusphere-2024-4013), 2025-01-09
Supplement: Supplementary file 1 [file egusphere-2024-4013-supplement.pdf]

1 Supporting Information for

2 **Human Activities Caused Hypoxia Expansion in a Large Eutrophic Estuary:**  
3 **Non-negligible Role of Riverine Suspended Sediments**

4  
5 Yue Nan<sup>1</sup>, Zheng Chen<sup>2</sup>, Bin Wang<sup>3</sup>, Bo Liang<sup>4</sup>, Jiatang Hu<sup>1,5,6\*</sup>

6 <sup>1</sup> School of Environmental Science and Engineering, Sun Yat-Sen University,  
7 Guangzhou, 510275, China

8 <sup>2</sup> Earth, Ocean and Atmospheric Sciences Thrust, The Hong Kong University of  
9 Science and Technology (Guangzhou), Guangzhou, 511455, China

10 <sup>3</sup> Department of Oceanography, Dalhousie University, Halifax, Nova Scotia, Canada

11 <sup>4</sup> Eco-Environmental Monitoring and Research Center, Pearl River Valley and South  
12 China Sea Ecology and Environment Administration, Ministry of Ecology and  
13 Environment of the People's Republic of China, Guangzhou, 510611, China

14 <sup>5</sup> Guangdong Provincial Key Laboratory of Environmental Pollution Control and  
15 Remediation Technology, Guangzhou, 510275, China

16 <sup>6</sup> Southern Marine Science and Engineering Guangdong Laboratory (Zhuhai), Zhuhai,  
17 519000, China

18  
19 \*Correspondence:

20 Jiatang Hu [hujtang@mail.sysu.edu.cn](mailto:hujtang@mail.sysu.edu.cn) ORCID <https://orcid.org/0000-0003-0763-9424>

21  
22  
23  
24 **Contents of this file**

25 Text S1. Model descriptions and settings of physical and suspended sediment modules

26 Table S1

27  
28

29 **Text S1. Model descriptions and settings of physical and suspended sediment**  
30 **modules**

31 **1.1 Physical model**

32 The physical model is a 1D-3D coupled model that integrates the Pearl River  
33 network (1D) and the PRE (3D) into an overall modelling system. This model was  
34 firstly developed by Hu and Li (2009) to study the nutrient flux budgets for the river  
35 network and the estuary (Fig. 1a), and was further utilized to investigate hypoxia  
36 dynamics (Huang et al., 2019; Wang et al., 2017; Wang et al., 2018; Zhang et al., 2022)  
37 and sediment-water nutrient exchanges (Liu et al., 2016) in the PRE.

38 The 1D component for the Pearl River network adopts a Preissmann implicit  
39 scheme and an iterative approach to solves the Saint-Venant equations of water mass  
40 and momentum conservation. A salinity transport module was also incorporated. The  
41 river network was discretized into 299 reaches and 1726 computational cross sections,  
42 with five upstream boundaries (including the Gaoyao, Shijiao, Boluo, Laoyagang, and  
43 Shizui hydrological stations). The Gaoyao, Shijiao, and Boluo sites were forced by real-  
44 time river discharge data, while the Laoyagang and Shizui sites were forced by real-  
45 time water level data. The riverine salinity at the upstream boundaries was set to zero.  
46 The initial conditions of water levels and salinity in the 1D model domain were set to  
47 zero.

48 The 3D component, covering the PRE and its adjacent shelf regions, is based on  
49 the Estuaries and Coastal Ocean Model (ECOM, (Blumberg, 2002)). It adopts  
50 Smagorinsky type formula (Smagorinsky, 1963) to calculate the horizontal mixing and  
51 utilizes the level-2.5 turbulent closure scheme developed by Mellor and Yamada (1982)  
52 to parameterize vertical viscosity and diffusivity. It has 183×186 horizontal grid cells  
53 with adaptive horizontal resolution that gradually decreases from ~400 m in the estuary  
54 to ~3 km over the shelf. In addition, it has 16 terrain-following vertical layers with  
55 refined resolution near the surface and bottom. Along the three open boundaries at the  
56 east, west, and the south, the tide forcing in the form of water levels was obtained from

57 Oregon State University Tidal Data Inversion Software (OTIS). Observed temperature  
58 and salinity profiles were spatial-uniformly applied at the three open boundaries (Hu  
59 and Li, 2009). The atmospheric conditions (e.g., wind speed, wind direction, and solar  
60 radiation) were interpolated onto the model grid, forced by the six-hourly reanalysis  
61 product of ERA-Interim ([http://www.ecmwf.int/en/research/climate-reanalysis/era-](http://www.ecmwf.int/en/research/climate-reanalysis/era-interim)  
62 [interim](http://www.ecmwf.int/en/research/climate-reanalysis/era-interim)). The initial temperature and salinity conditions were spatial-uniformly set to  
63 20 °C and 34.5 PSU, respectively.

64 The exchange of water mass between the 1D and the 3D model domains is coupled  
65 at the eight river outlets. Briefly, at each time step, the 3D model utilizes the simulated  
66 discharge obtained from the 1D model as the river boundary forcing and the 3D model  
67 sends simulated water levels to the 1D model as the downstream boundary forcing for  
68 the next time step. The detailed description of the methodology and setting of the  
69 coupled 1D-3D physical model can be found in Hu and Li (2009).

## 70 **1.2 Suspended sediment module**

71 The transport and fate of sediments in the PRE were simulated by a cohesive  
72 sediment module incorporated within the ECOM (Blumberg, 2002). This module  
73 shares the same model grid and computational framework as the hydrodynamics  
74 module. It simulates the sediment dynamics including sediment transport, deposition,  
75 and resuspension. The governing equation of suspended sediments in the water column  
76 is formulated as follows:

$$77 \frac{\partial C}{\partial t} = - \left( U \frac{\partial C}{\partial x} + V \frac{\partial C}{\partial y} + (W - W_s) \frac{\partial C}{\partial z} \right) + \frac{\partial}{\partial x} \left( A_H \frac{\partial C}{\partial x} \right) + \frac{\partial}{\partial y} \left( A_H \frac{\partial C}{\partial y} \right) + \frac{\partial}{\partial z} \left( K_H \frac{\partial C}{\partial z} \right) \quad (s1)$$

78 where  $C$  is the suspended sediment concentration (SSC, mg/L);  $U$ ,  $V$  and  $W$  are the  
79 water velocity components in the x, y and z directions (m/s), respectively;  $W_s$  is the  
80 sinking rate of the suspended sediments (m/s);  $A_H$  is the horizontal diffusion coefficient;  
81  $K_H$  is the vertical diffusion coefficient.

82 Detailed governing equations including boundary conditions treatment, bottom  
83 shear stress parameterization, resuspension and deposition characterization can be

84 found in Blumberg (2002). The riverine inputs of suspended sediments at the eight river  
85 outlets were prescribed based on observations. The open boundary and initial  
86 conditions of SSC were set to zeros.  
87

88 **Table S1. Data source of long-term water quality changes in the Pearl River**

89 **Estuary (PRE).**

| Data                  | Year      | Source                                                      |
|-----------------------|-----------|-------------------------------------------------------------|
| Bottom DO             | 1985-2013 | This study (can also found in Hu et al. (2021)).<br>(2021)) |
| Bottom DO             | 2014      | Su et al. (2017)                                            |
| Bottom DO             | 2015&2017 | Li et al. (2021)                                            |
| Bottom DO             | 1990-2017 | Environmental Protection Department of Hong Kong            |
| Riverine DIN, DIP, DO | 1990-2017 | This study                                                  |
| Riverine SSC          | 1990-2017 | China River Sediment Bulletin                               |

90 Note: DO (dissolved oxygen); dissolved inorganic nitrogen (DIN); dissolved inorganic  
91 phosphorus (DIP); suspended sediment concentration (SSC).

92

93

94 **References**

95 Blumberg, A.: A primer for ECOMSED, Hydroqual Inc, 188, 2002.

96 Hu, J. and Li, S.: Modeling the mass fluxes and transformations of nutrients in the Pearl  
97 River Delta, China, Journal of Marine Systems, 78, 146-167,  
98 <https://doi.org/10.1016/j.jmarsys.2009.05.001>, 2009.

99 Hu, J., Zhang, Z., Wang, B., and Huang, J.: Long-term spatiotemporal variations and  
100 expansion of low-oxygen conditions in the Pearl River estuary: A study synthesizing  
101 observations during 1976–2017, 10.5194/bg-2020-480, 2021.

102 Huang, J., Hu, J., Li, S., Wang, B., Xu, Y., Liang, B., and Liu, D.: Effects of Physical  
103 Forcing on Summertime Hypoxia and Oxygen Dynamics in the Pearl River Estuary,  
104 10.3390/w11102080, 2019.

105 Li, D., Gan, J., Hui, C., Yu, L., Liu, Z., Lu, Z., Kao, S.-j., and Dai, M.: Spatiotemporal  
106 Development and Dissipation of Hypoxia Induced by Variable Wind-Driven Shelf  
107 Circulation off the Pearl River Estuary: Observational and Modeling Studies, Journal  
108 of Geophysical Research: Oceans, 126, e2020JC016700,  
109 <https://doi.org/10.1029/2020JC016700>, 2021.

110 Liu, D., Hu, J., Li, S., and Huang, J.: Validation and application of a three-dimensional  
111 coupled water quality and sediment model of the Pearl River Estuary, 36, 4025-4036,  
112 10.13671/j.hjkxxb.2016.0145, 2016.

113 Mellor, G. L. and Yamada, T.: Development of a turbulence closure model for  
114 geophysical fluid problems, Reviews of Geophysics, 20, 851-875, 1982.

115 Smagorinsky, J.: General circulation experiments with the primitive equations: I. The  
116 basic experiment, Monthly weather review, 91, 99-164, 1963.

117 Su, J., Dai, M., He, B., Wang, L., Gan, J., Guo, X., Zhao, H., and Yu, F.: Tracing the  
118 origin of the oxygen-consuming organic matter in the hypoxic zone in a large eutrophic

119 estuary: the lower reach of the Pearl River Estuary, China, *Biogeosciences*, 14, 4085-  
120 4099, 10.5194/bg-14-4085-2017, 2017.  
121 Wang, B., Hu, J., Li, S., and Liu, D.: A numerical analysis of biogeochemical controls  
122 with physical modulation on hypoxia during summer in the Pearl River estuary,  
123 *Biogeosciences*, 14, 2979-2999, 10.5194/bg-14-2979-2017, 2017.  
124 Wang, B., Hu, J., Li, S., Yu, L., and Huang, J.: Impacts of anthropogenic inputs on  
125 hypoxia and oxygen dynamics in the Pearl River estuary, *Biogeosciences*, 15, 6105-  
126 6125, 10.5194/bg-15-6105-2018, 2018.  
127 Zhang, Z., Wang, B., Li, S., Huang, J., and Hu, J.: On the Intra-annual Variation of  
128 Dissolved Oxygen Dynamics and Hypoxia Development in the Pearl River Estuary,  
129 *Estuaries and Coasts*, 45, 1305-1323, 10.1007/s12237-021-01022-0, 2022.  
130
